# Supplementary material for: Palladium(ii) complexes with highly basic imidazolin-2-imines and their reactivity toward small bio-molecules
Source: Royal Society of Chemistry journal article supplement (doi:10.1039/c5dt02307f), 2015-01-01
Supplement: c5dt02307f1.pdf [file c5dt02307f1.pdf]

**Palladium(II) complexes of highly basic imidazolin-2-imines and their reactivity toward small bio-molecules**

Jovana Bogojeski,<sup>a</sup> Jeroen Volbeda,<sup>b</sup> Matthias Freytag,<sup>b</sup> Matthias Tamm<sup>b\*</sup> and Živadin D.

Bugarčić,<sup>a\*</sup>

*<sup>a</sup> Department of Chemistry, Faculty of Science, University of Kragujevac, R. Domanovića 12,  
P. O. Box 60, 34000 Kragujevac, Serbia*

*<sup>b</sup>Institut für Anorganische und Analytische Chemie, Technische Universität Braunschweig,  
Hagenring 30, 38106 Braunschweig, Germany*

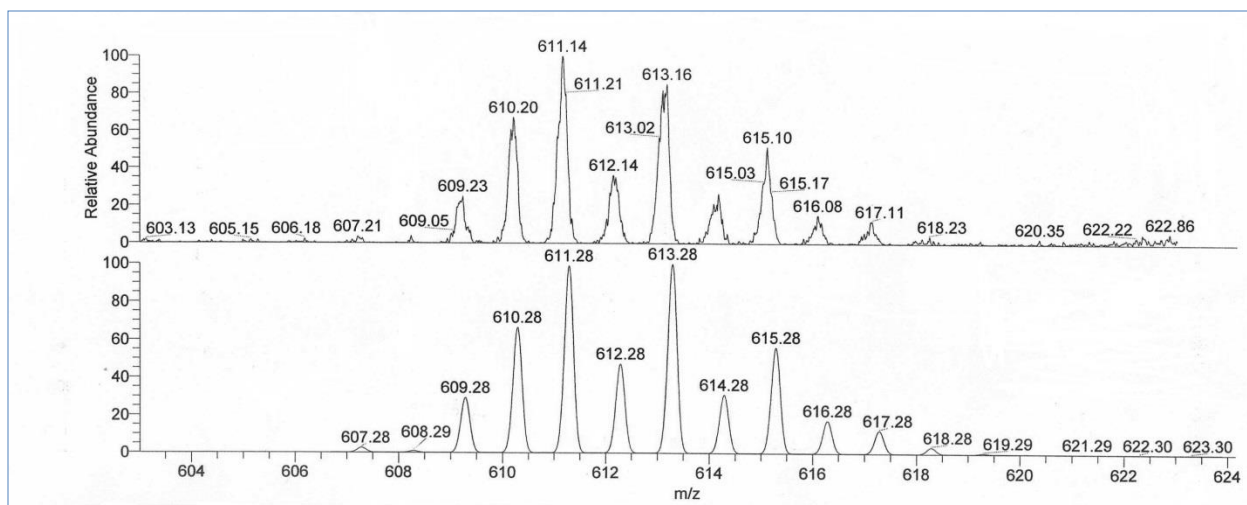

**Figure S1.** Isotopic patterns of the peak around  $m/z = 611$ , which belongs to the  $[\text{Pd}(\text{DACH}(\text{Im}^{\text{iPr}})_2)\text{Cl}_2]$  complex, without one chloride ion, *ie.*  $[\text{Pd}(\text{DACH}(\text{Im}^{\text{iPr}})_2)\text{Cl}]^+$ .

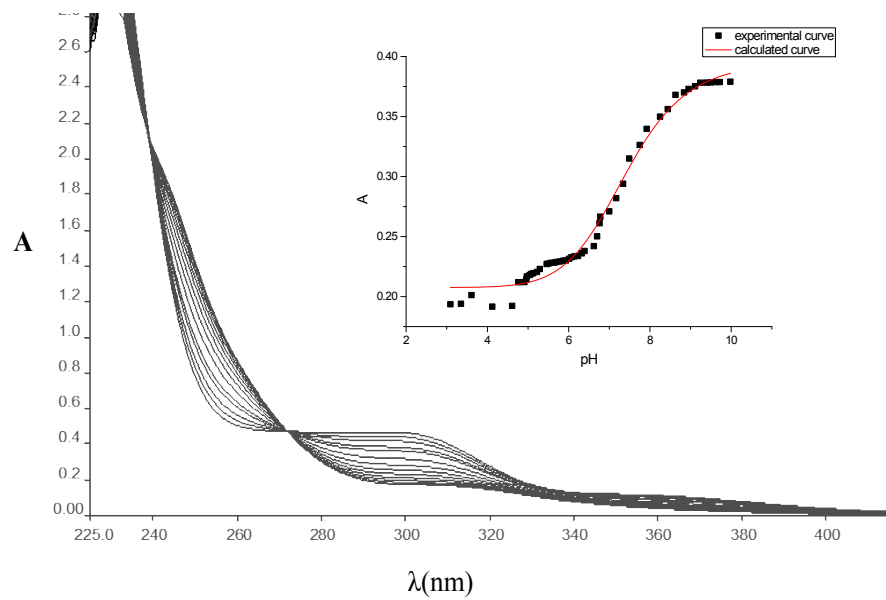

**Figure S2.** UV-vis spectra recorded for 0.1 mM  $[\text{Pd}(\text{DMEAIm}^{i\text{Pr}})(\text{H}_2\text{O})_2]^{2+}$  in the pH range 2 to 12 at 25 °C. Insert: Plot of absorbance vs pH at 255 nm (experimental and calculated curve).

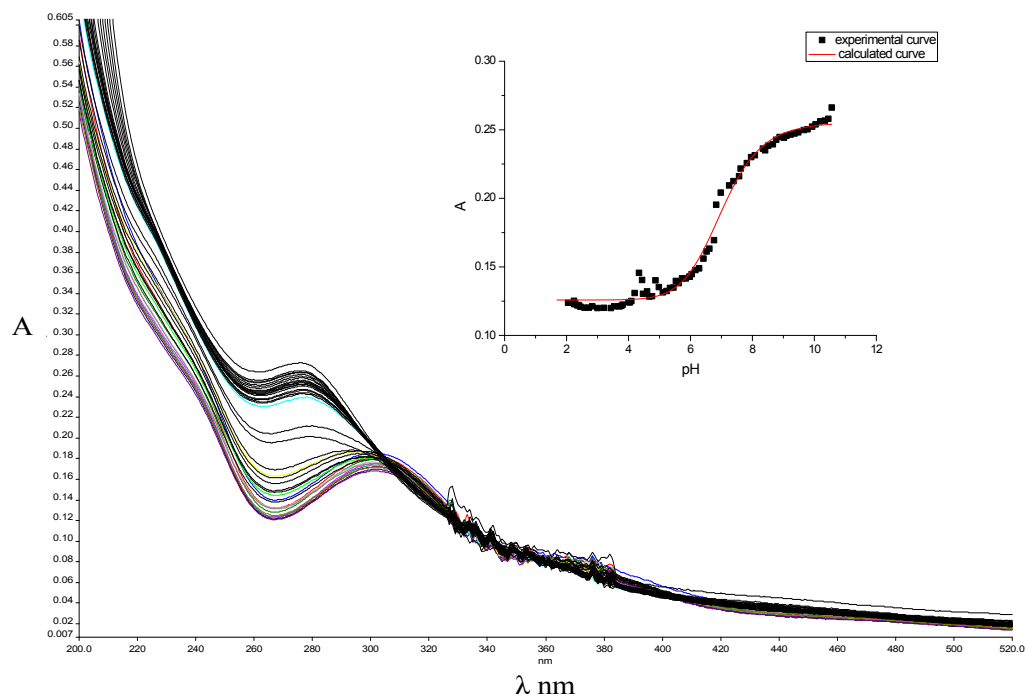

**Figure S3.** UV-vis spectra recorded for 0.1 mM  $[Pd(EAIm^{iPr})(H_2O)_2]^{2+}$  in the pH range 2 to 11 at 25 °C. Insert: Plot of absorbance vs pH at 270 nm (experimental and calculated curve).

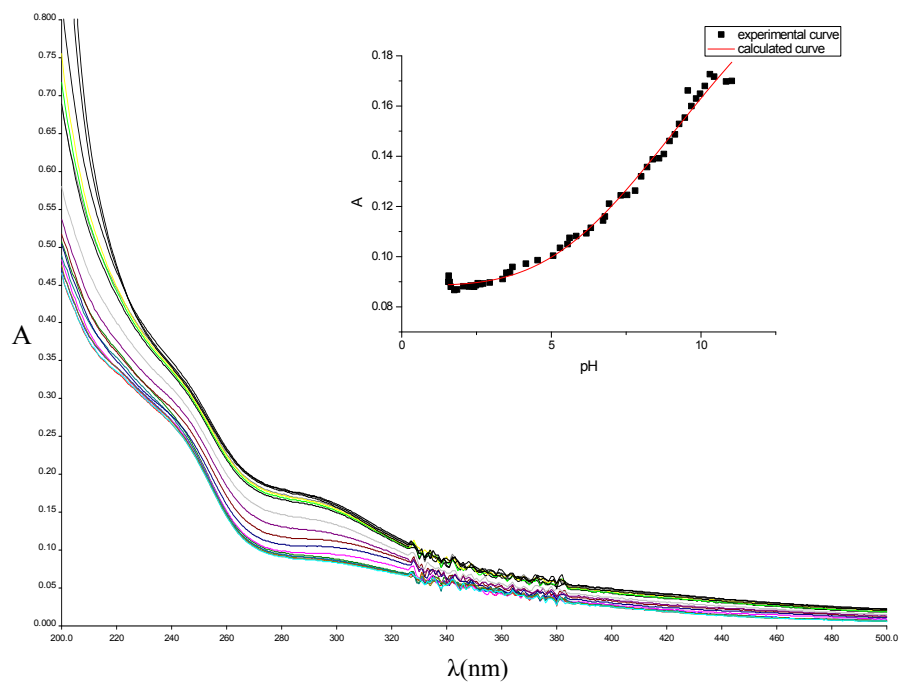

**Figure S4.** UV-vis spectra recorded for 0.1 mM  $[\text{Pd}(\text{DACH}(\text{Im}^{i\text{Pr}})_2)(\text{H}_2\text{O})_2]^{2+}$  in the pH range 2 to 11 at 25 °C. Insert: Plot of absorbance vs pH at 280 nm (experimental and calculated curve).

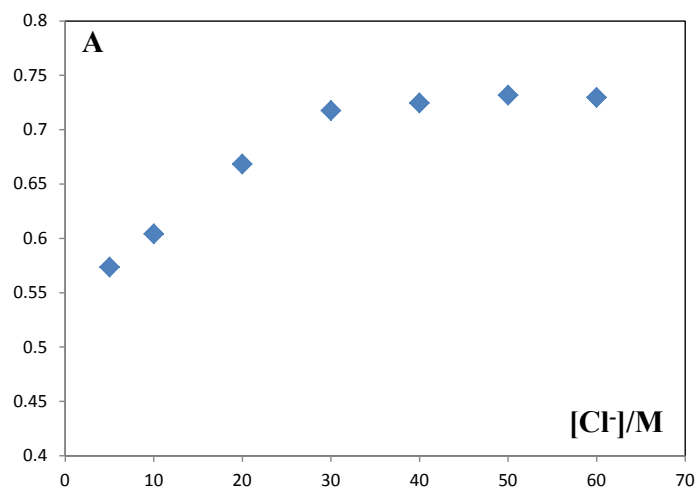

**Figure S5.** The effect of different concentrations of chloride ions on the change in absorbance in the solution of the complex  $[\text{Pd}(\text{DMEAIM}^{\text{IP}})\text{Cl}_2]$  in 25 mM Hepes buffer ( $\text{pH} \approx 7,2$ ) at 270 nm.

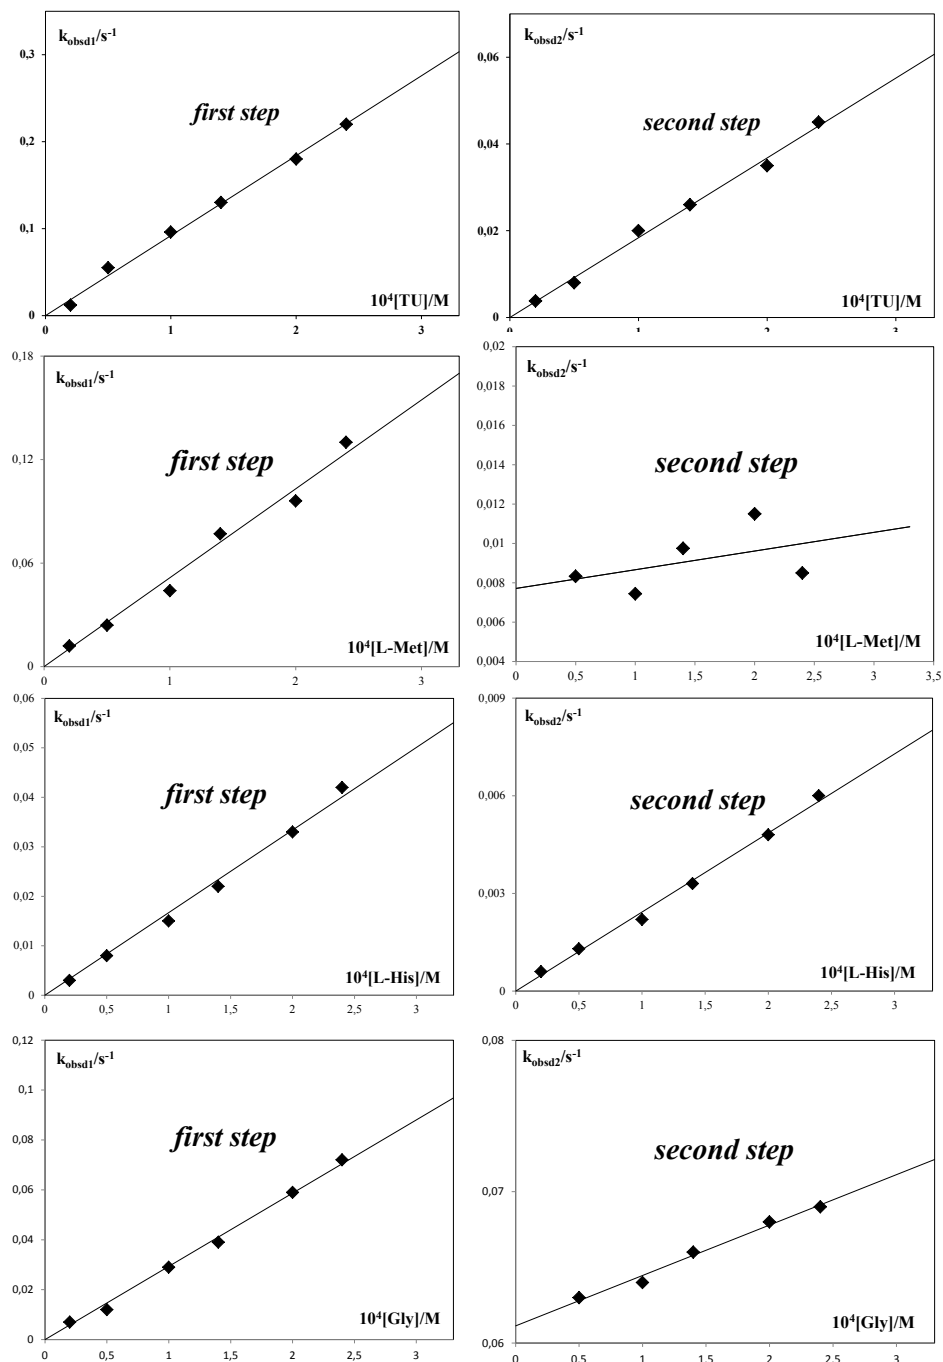

**Figure S6.** Pseudo-first-order rate constants plotted as a function of nucleophile concentration for the first and second step of the substitution reactions of the  $[\text{Pd}(\text{BL}^{i\text{Pr}})\text{Cl}_2]$  complexes with TU, L-Met, L-His and Gly at pH = 7.2 and 310 K in 25 mM HEPES buffer and 30 mM NaCl.

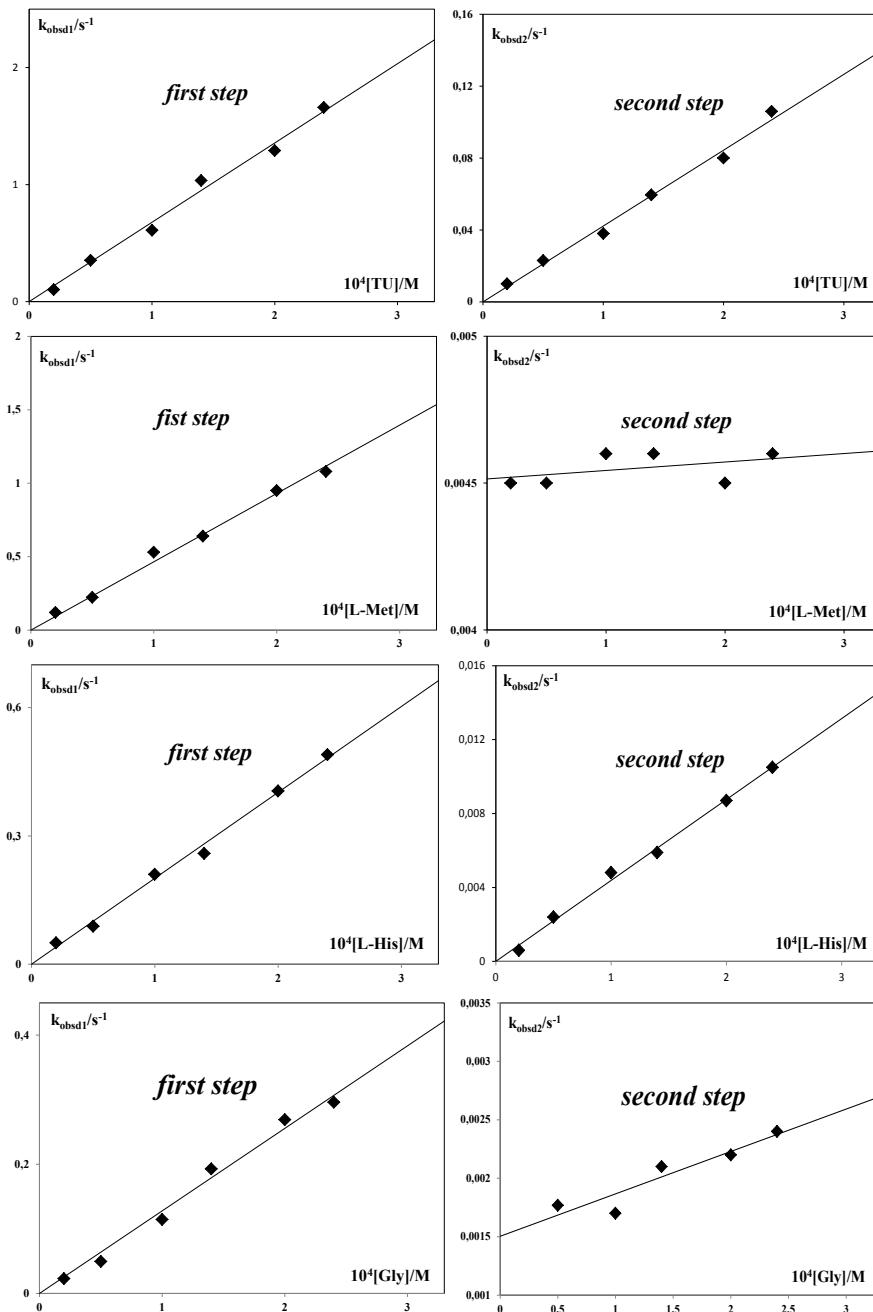

**Figure S7.** *Pseudo*-first-order rate constants plotted as a function of nucleophile concentration for the first and second step of the substitution reactions of the  $[Pd(DMEAI m^{iPr})Cl_2]$  complexes with TU, L-Met, L-His and Gly at  $pH = 7.2$  and 310 K in 25 mM Hepes buffer and 30 mM NaCl.



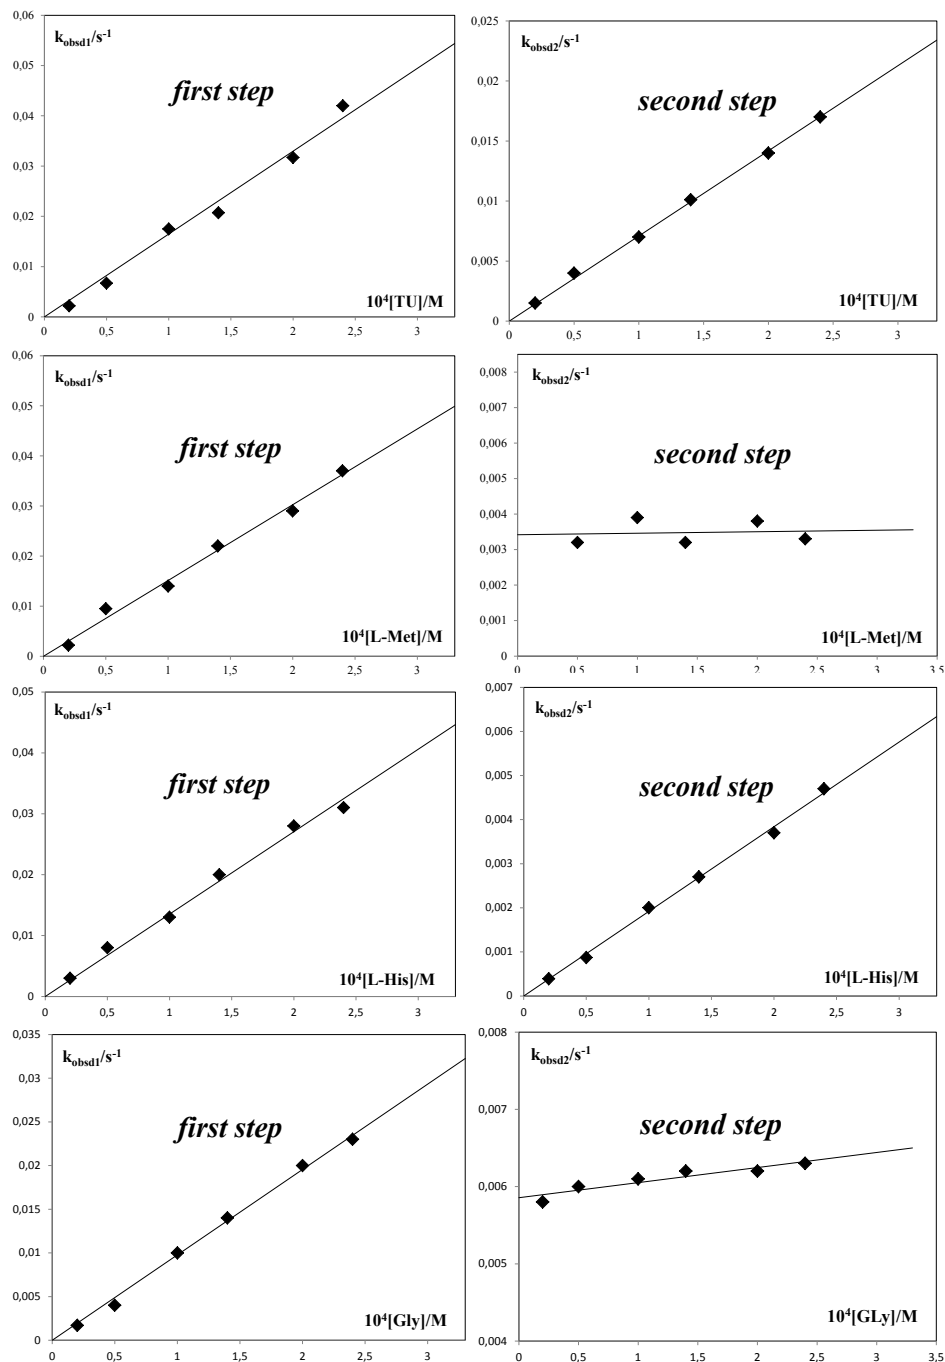

**Figure S8.** Pseudo-first-order rate constants plotted as a function of nucleophile concentration for the first and second step of the substitution reactions of the  $[Pd(DACH(Im^{iPr})_2)Cl_2]$  complexes with TU, L-Met, L-His and Gly at pH = 7.2 and 310 K in 25 mM HEPES buffer and 30 mM NaCl.

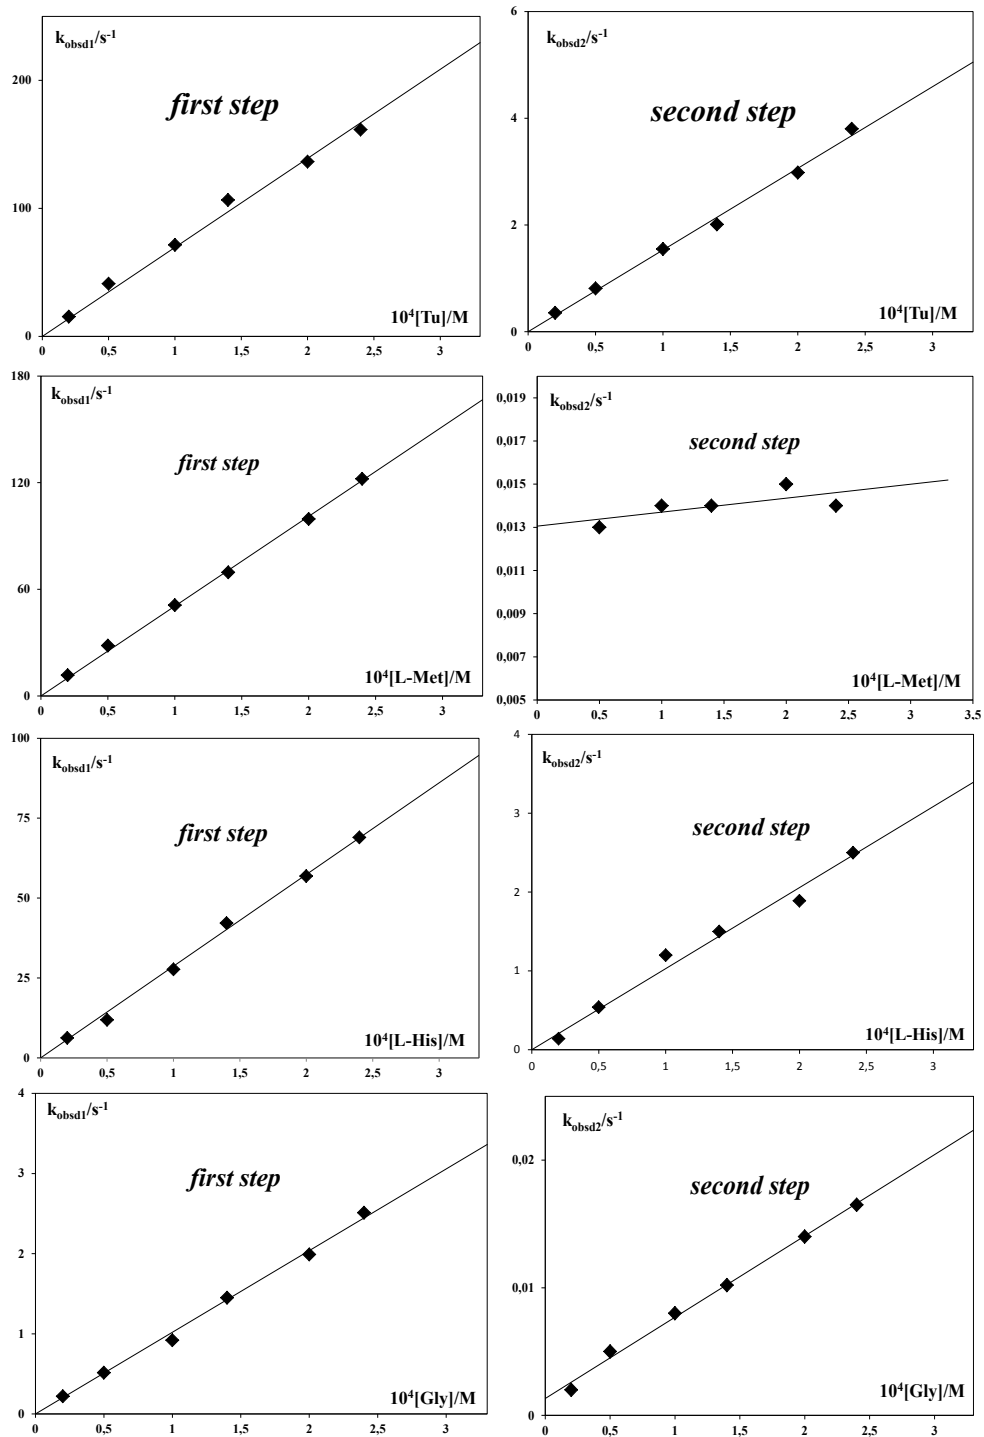

**Figure S9.** Pseudo-first-order rate constants plotted as a function of nucleophile concentration for the first and second step of the substitution reactions of the  $[\text{Pd}(\text{en})\text{Cl}_2]$  complexes with TU, L-Met, L-His and Gly at  $\text{pH} = 7.2$  and  $310 \text{ K}$  in  $25 \text{ mM}$  HEPES buffer and  $30 \text{ mM}$  NaCl.

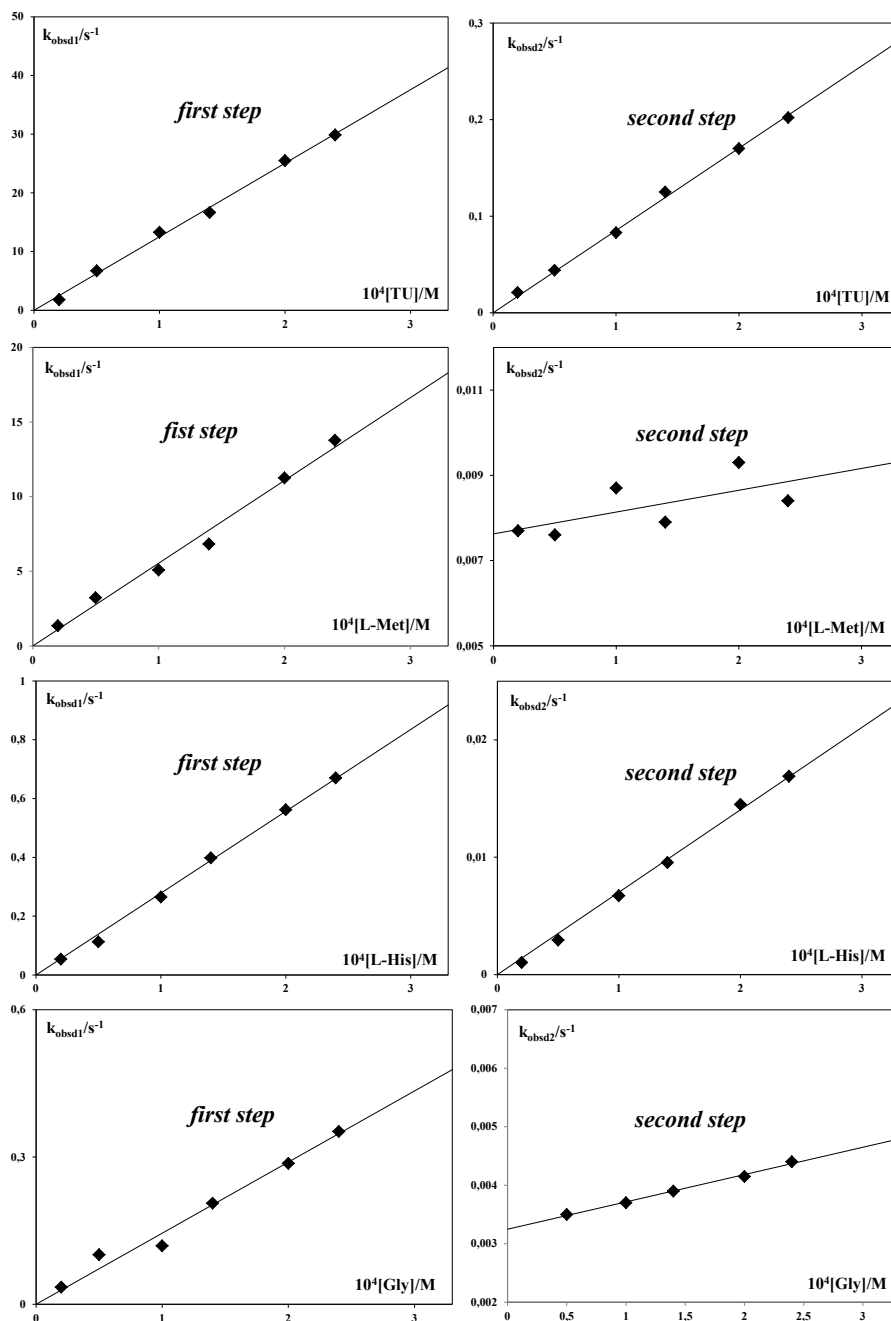

**Figure S10.** Pseudo-first-order rate constants plotted as a function of nucleophile concentration for the first and second step of the substitution reactions of the  $[\text{Pd}(\text{EAI}m^{i\text{Pr}})\text{Cl}_2]$  complexes with TU, L-Met, L-His and Gly at  $\text{pH} = 7.2$  and  $310 \text{ K}$  in  $25 \text{ mM}$  HEPES buffer and  $30 \text{ mM}$  NaCl.

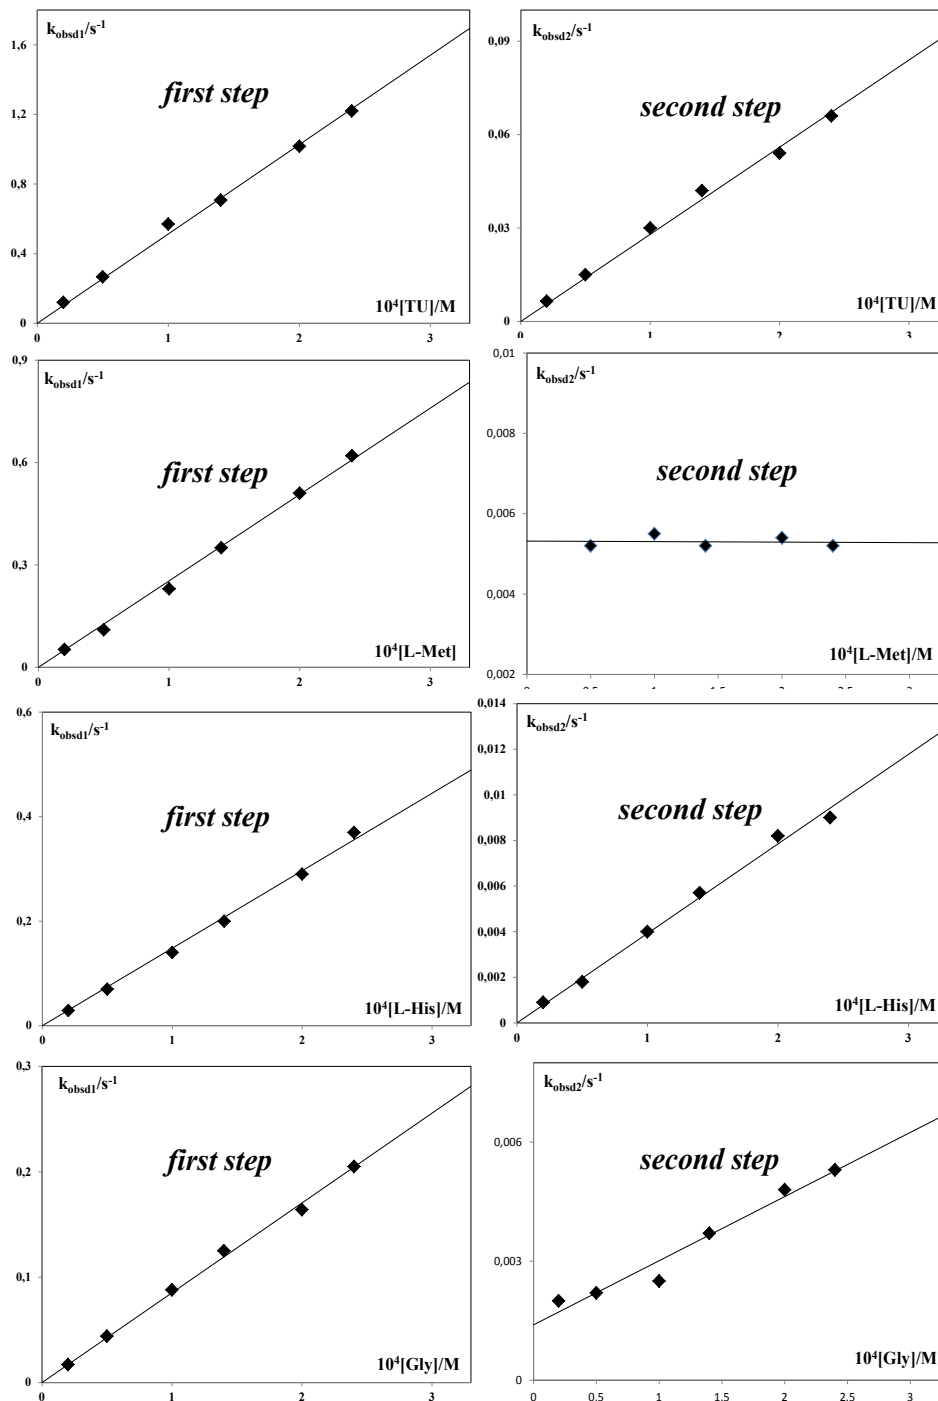

**Figure S11.** Pseudo-first-order rate constants plotted as a function of nucleophile concentration for the first and second step of the substitution reactions of the  $[Pd(DPENIm^{iPr})Cl_2]$  complexes with TU, L-Met, L-His and Gly at pH = 7.2 and 310 K in 25 mM HEPES buffer and 30 mM NaCl.

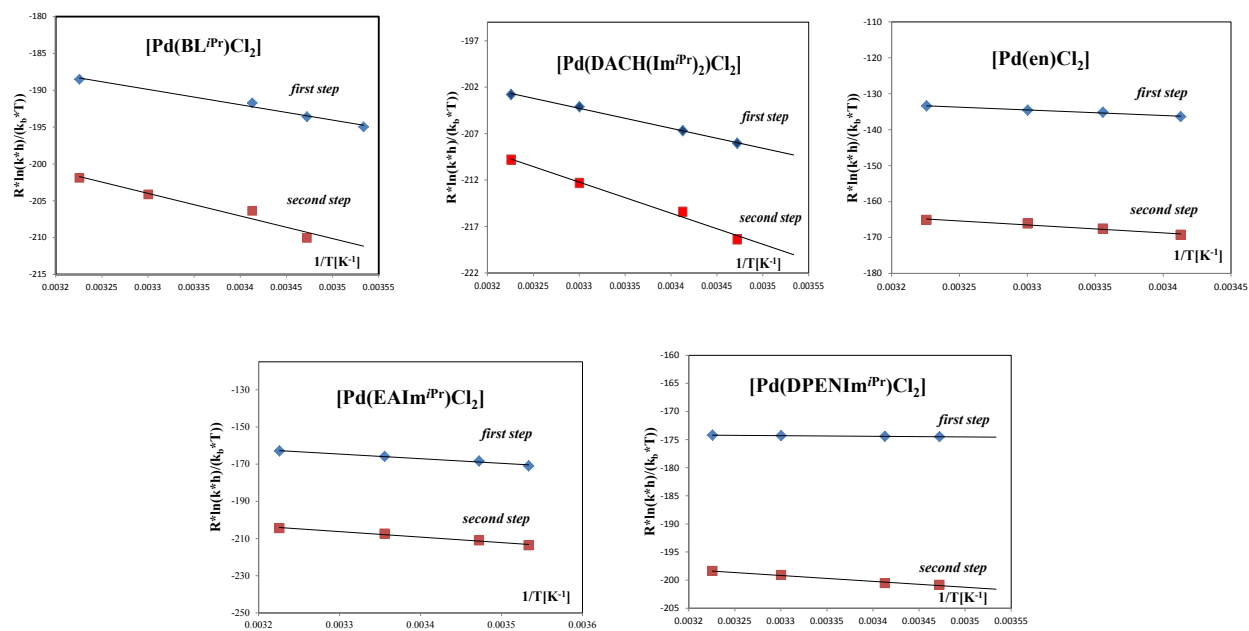

**Figure S12.** Eyring plots for the two reaction steps of the studied Pd(II) complexes with TU in 25 mM HEPES buffer, 30 mM NaCl at pH = 7.2.

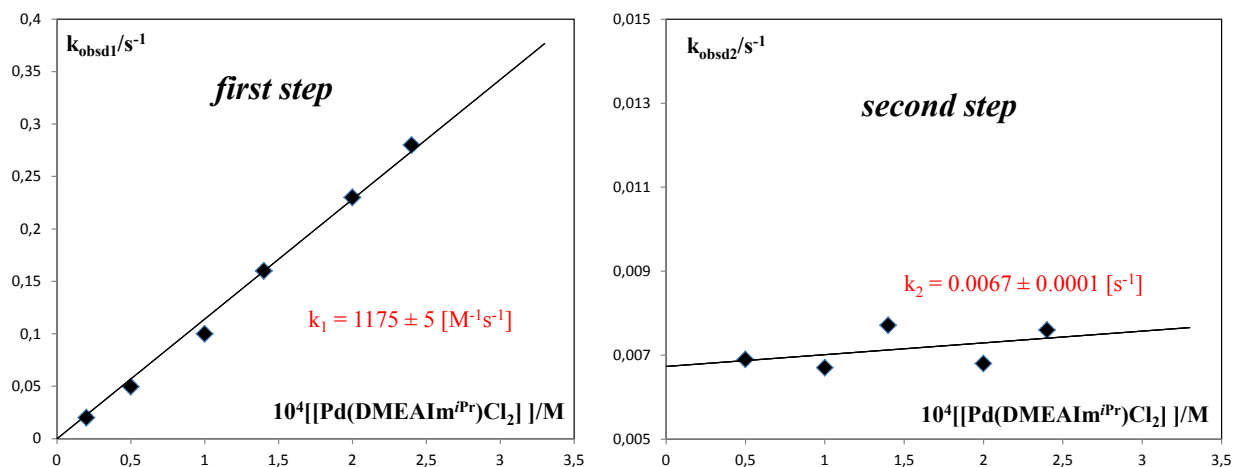

**Figure S13.** Pseudo-first-order rate constants plotted as a function of complex concentration for the first and second step of the substitution reactions of the  $[\text{Pd}(\text{DMEAlm}^{i\text{Pr}})\text{Cl}_2]$  complexes with Gly at pH = 7.2 and 310 K in 25 mM Hepes buffer and 30 mM NaCl.

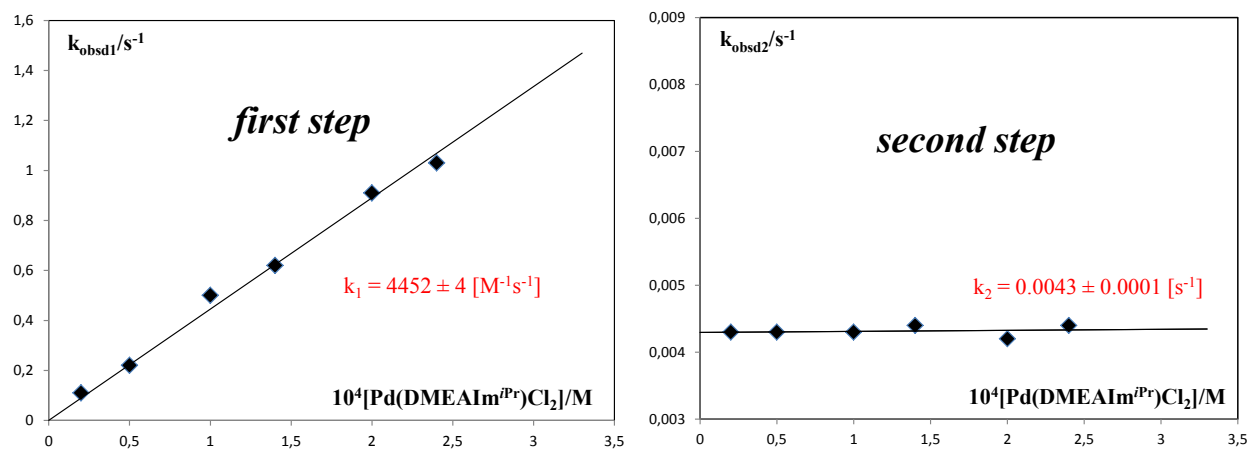

**Figure S14.** Pseudo-first-order rate constants plotted as a function of complex concentration for the first and second step of the substitution reactions of the  $[\text{Pd}(\text{DMEAlm}^{i\text{Pr}})\text{Cl}_2]$  complexes with L-Met at pH = 7.2 and 310 K in 25 mM Hepes buffer and 30 mM NaCl.

**Table S1.** The rate constants obtained for the substitution reactions of aqua Pt(II) complexes with TU at 298 K.<sup>26</sup>

|                                                                                      | <i>first step</i><br>$k_1$ (M <sup>-1</sup> s <sup>-1</sup> ) | <i>second step</i><br>$k_2$ (M <sup>-1</sup> s <sup>-1</sup> ) |
|--------------------------------------------------------------------------------------|---------------------------------------------------------------|----------------------------------------------------------------|
| [Pt(en)(H <sub>2</sub> O) <sub>2</sub> ] <sup>2+</sup>                               | 34.0 ± 0.4                                                    | 10.2 ± 0.2                                                     |
| [Pt(dach)(H <sub>2</sub> O) <sub>2</sub> ] <sup>2+</sup>                             | 21 ± 1                                                        | 11.5 ± 0.5                                                     |
| [Pt(amp)(H <sub>2</sub> O) <sub>2</sub> ] <sup>2+</sup><br>amp = aminomethylpyridine | 233 ± 5                                                       | 38 ± 1                                                         |
| [Pt(bpy)(H <sub>2</sub> O) <sub>2</sub> ] <sup>2+</sup><br>Bpy = N,N'-bipyridine     | 5081 ± 275                                                    | 1119 ± 22                                                      |

**Table S2.** Activation parameters for the first and the second reaction steps between investigated Pd(II) complexes and TU at pH = 7.2, 25 mM Hepes buffer and 30 mM NaCl.

|                                                              | <i>first step</i>                                |                                                                | <i>second step</i>                               |                                                                |
|--------------------------------------------------------------|--------------------------------------------------|----------------------------------------------------------------|--------------------------------------------------|----------------------------------------------------------------|
|                                                              | $\Delta H_1^\ddagger$<br>[kJ mol <sup>-1</sup> ] | $\Delta S_1^\ddagger$<br>[JK <sup>-1</sup> mol <sup>-1</sup> ] | $\Delta H_2^\ddagger$<br>[kJ mol <sup>-1</sup> ] | $\Delta S_2^\ddagger$<br>[JK <sup>-1</sup> mol <sup>-1</sup> ] |
| [Pd(en)Cl <sub>2</sub> ]                                     | 15 ± 1                                           | -84 ± 4                                                        | 22 ± 3                                           | -93 ± 9                                                        |
| [Pd(EAIm <sup>iPr</sup> )Cl <sub>2</sub> ]                   | 25 ± 2                                           | -82 ± 8                                                        | 30 ± 2                                           | -109 ± 9                                                       |
| [Pd(DMEAIm <sup>iPr</sup> )Cl <sub>2</sub> ]                 | 28 ± 2                                           | -80 ± 8                                                        | 25 ± 2                                           | -114 ± 6                                                       |
| [Pd(DPENIm <sup>iPr</sup> )Cl <sub>2</sub> ]                 | 11 ± 1                                           | -170 ± 2                                                       | 10 ± 1                                           | -165 ± 3                                                       |
| [Pd(BL <sup>iPr</sup> )Cl <sub>2</sub> ]                     | 20 ± 2                                           | -121 ± 6                                                       | 30 ± 5                                           | -103 ± 16                                                      |
| [Pd(DACH(Im <sup>iPr</sup> ) <sub>2</sub> )Cl <sub>2</sub> ] | 22 ± 1                                           | -133 ± 3                                                       | 33 ± 3                                           | -101 ± 9                                                       |



**Table S3** Observed *pseudo*-first order rate constants as a function of nucleophile concentration and temperature for the reaction between complex [Pd(en)Cl<sub>2</sub>] and TU at pH = 7.2 (25 mM Hepes buffer) in the presence of 30 mM NaCl at 310 K.

| T(K)  | 10 <sup>4</sup> C <sub>TU</sub> /M | first step<br>k <sub>obsd1</sub> /s <sup>-1</sup> | second step<br>k <sub>obsd2</sub> /s <sup>-1</sup> |
|-------|------------------------------------|---------------------------------------------------|----------------------------------------------------|
| 310.0 | 2.40                               | 161.52(6)                                         | 3.80(6)                                            |
|       | 2.00                               | 136.49(6)                                         | 2.98(6)                                            |
|       | 1.40                               | 106.49(6)                                         | 2.01(6)                                            |
|       | 1.00                               | 71.36(6)                                          | 1.55(6)                                            |
|       | 0.50                               | 41.10(5)                                          | 0.81(5)                                            |
|       | 0.20                               | 15.33(4)                                          | 0.35(4)                                            |

<sup>a</sup>Number of runs in parentheses

**Table S4** Observed *pseudo*-first order rate constants as a function of nucleophile concentration and temperature for the reaction between complex [Pd(en)Cl<sub>2</sub>] and L-Met at pH = 7.2 (25 mM Hepes buffer) in the presence of 30 mM NaCl at 310 K.

| T(K)  | 10 <sup>4</sup> C <sub>L-Met</sub> /M | first step<br>k <sub>obsd1</sub> /s <sup>-1</sup> | second step<br>k <sub>obsd2</sub> /s <sup>-1</sup> |
|-------|---------------------------------------|---------------------------------------------------|----------------------------------------------------|
| 310.0 | 2.40                                  | 122.14(6)                                         | 0.014(6)                                           |
|       | 2.00                                  | 99.52(6)                                          | 0.015(6)                                           |
|       | 1.40                                  | 69.54(6)                                          | 0.014(6)                                           |
|       | 1.00                                  | 51.12(6)                                          | 0.014(6)                                           |
|       | 0.50                                  | 28.33(5)                                          | 0.013(5)                                           |
|       | 0.20                                  | 11.65(5)                                          | /                                                  |

**Table S5** Observed *pseudo*-first order rate constants as a function of nucleophile concentration and temperature for the reaction between complex [Pd(en)Cl<sub>2</sub>] and L-His at pH = 7.2 (25 mM Hepes buffer) in the presence of 30 mM NaCl at 310 K.

| T(K)  | 10 <sup>4</sup> C <sub>L-His</sub> /M | first step<br>k <sub>obsd1</sub> /s <sup>-1</sup> | second step<br>k <sub>obsd2</sub> /s <sup>-1</sup> |
|-------|---------------------------------------|---------------------------------------------------|----------------------------------------------------|
| 310.0 | 2.40                                  | 68.98(6)                                          | 2.50(6)                                            |
|       | 2.00                                  | 56.88(6)                                          | 1.89(6)                                            |
|       | 1.40                                  | 42.15(6)                                          | 1.50(6)                                            |
|       | 1.00                                  | 27.66(6)                                          | 1.20(6)                                            |
|       | 0.50                                  | 11.89(5)                                          | 0.54(5)                                            |
|       | 0.20                                  | 6.22(5)                                           | 0.14(5)                                            |

**Table S6** Observed *pseudo*-first order rate constants as a function of nucleophile concentration and temperature for the reaction between complex [Pd(en)Cl<sub>2</sub>] and Gly at pH = 7.2 (25 mM Hepes buffer) in the presence of 30 mM NaCl at 310 K.

| T(K)  | 10 <sup>4</sup> C <sub>Gly</sub> /M | first step<br>k <sub>obsd1</sub> /s <sup>-1</sup> | second step<br>k <sub>obsd2</sub> /s <sup>-1</sup> |
|-------|-------------------------------------|---------------------------------------------------|----------------------------------------------------|
| 310.0 | 2.40                                | 2.51(6)                                           | 0.017(6)                                           |
|       | 2.00                                | 1.99(6)                                           | 0.014(6)                                           |
|       | 1.40                                | 1.45(6)                                           | 0.010(6)                                           |
|       | 1.00                                | 0.92(6)                                           | 0.008(6)                                           |
|       | 0.50                                | 0.52(6)                                           | 0.005(6)                                           |
|       | 0.20                                | 0.22(5)                                           | 0.002(5)                                           |

**Table S7** Observed *pseudo*-first order rate constants as a function of nucleophile concentration and temperature for the reaction between complex [Pd(EAIm<sup>iPr</sup>)Cl<sub>2</sub>] and TU at pH = 7.2 (25 mM HEPES buffer) in the presence of 30 mM NaCl at 310 K.

| T(K)  | 10 <sup>4</sup> C <sub>Gly</sub> /M | first step<br>k <sub>obsd1</sub> /s <sup>-1</sup> | second step<br>k <sub>obsd2</sub> /s <sup>-1</sup> |
|-------|-------------------------------------|---------------------------------------------------|----------------------------------------------------|
| 310.0 | 2.40                                | 29.89(6)                                          | 0.20(6)                                            |
|       | 2.00                                | 25.49(6)                                          | 0.17(6)                                            |
|       | 1.40                                | 16.65(6)                                          | 0.13(6)                                            |
|       | 1.00                                | 13.27(6)                                          | 0.083(6)                                           |
|       | 0.50                                | 6.71(6)                                           | 0.044(6)                                           |
|       | 0.20                                | 1.80(5)                                           | 0.021(5)                                           |

**Table S8** Observed *pseudo*-first order rate constants as a function of nucleophile concentration and temperature for the reaction between complex [Pd(EAIm<sup>iPr</sup>)Cl<sub>2</sub>] and L-Met at pH = 7.2 (25 mM HEPES buffer) in the presence of 30 mM NaCl at 310 K.

| T(K)  | 10 <sup>4</sup> C <sub>L-Met</sub> /M | first step<br>k <sub>obsd1</sub> /s <sup>-1</sup> | second step<br>k <sub>obsd2</sub> /s <sup>-1</sup> |
|-------|---------------------------------------|---------------------------------------------------|----------------------------------------------------|
| 310.0 | 2.40                                  | 13.78(6)                                          | 0.0084(6)                                          |
|       | 2.00                                  | 11.25(6)                                          | 0.0093(6)                                          |
|       | 1.40                                  | 6.83(6)                                           | 0.0087(6)                                          |
|       | 1.00                                  | 5.08(6)                                           | 0.0076(6)                                          |
|       | 0.50                                  | 3.23(6)                                           | 0.0079(6)                                          |
|       | 0.20                                  | 1.35(5)                                           | 0.0077(5)                                          |

**Table S9** Observed *pseudo*-first order rate constants as a function of nucleophile concentration and temperature for the reaction between complex [Pd(EAIm<sup>iPr</sup>)Cl<sub>2</sub>] and L-His at pH = 7.2 (25 mM Hepes buffer) in the presence of 30 mM NaCl at 310 K.

| T(K)  | 10 <sup>4</sup> C <sub>L-His</sub> /M | first step<br>k <sub>obsd1</sub> /s <sup>-1</sup> | second step<br>k <sub>obsd2</sub> /s <sup>-1</sup> |
|-------|---------------------------------------|---------------------------------------------------|----------------------------------------------------|
| 310.0 | 2.40                                  | 0.67(6)                                           | 0.017(6)                                           |
|       | 2.00                                  | 0.56(6)                                           | 0.014(6)                                           |
|       | 1.40                                  | 0.40(6)                                           | 0.010(6)                                           |
|       | 1.00                                  | 0.26(6)                                           | 0.007(6)                                           |
|       | 0.50                                  | 0.11(6)                                           | 0.003(6)                                           |
|       | 0.20                                  | 0.05(5)                                           | 0.001(5)                                           |

**Table S10** Observed *pseudo*-first order rate constants as a function of nucleophile concentration and temperature for the reaction between complex [Pd(EAIm<sup>iPr</sup>)Cl<sub>2</sub>] and Gly at pH = 7.2 (25 mM Hepes buffer) in the presence of 30 mM NaCl at 310 K.

| T(K)  | 10 <sup>4</sup> C <sub>Gly</sub> /M | first step<br>k <sub>obsd1</sub> /s <sup>-1</sup> | second step<br>k <sub>obsd2</sub> /s <sup>-1</sup> |
|-------|-------------------------------------|---------------------------------------------------|----------------------------------------------------|
| 310.0 | 2.40                                | 0.35(6)                                           | 0.0044(6)                                          |
|       | 2.00                                | 0.29(6)                                           | 0.0041(6)                                          |
|       | 1.40                                | 0.21(6)                                           | 0.0039(6)                                          |
|       | 1.00                                | 0.12(6)                                           | 0.0037(6)                                          |
|       | 0.50                                | 0.10(6)                                           | 0.0035(6)                                          |
|       | 0.20                                | 0.03(5)                                           | /                                                  |

**Table S11** Observed *pseudo*-first order rate constants as a function of nucleophile concentration and temperature for the reaction between complex [Pd(DPENIm<sup>iPr</sup>)Cl<sub>2</sub>] and TU at pH = 7.2 (25 mM Hepes buffer) in the presence of 30 mM NaCl at 310 K.

| T(K)  | 10 <sup>4</sup> C <sub>TU</sub> /M | first step<br>k <sub>obsd1</sub> /s <sup>-1</sup> | second step<br>k <sub>obsd2</sub> /s <sup>-1</sup> |
|-------|------------------------------------|---------------------------------------------------|----------------------------------------------------|
| 310.0 | 2.40                               | 1.22(6)                                           | 0.066(6)                                           |
|       | 2.00                               | 1.02(6)                                           | 0.054(6)                                           |
|       | 1.40                               | 0.71(6)                                           | 0.042(6)                                           |
|       | 1.00                               | 0.57(6)                                           | 0.030(6)                                           |
|       | 0.50                               | 0.27(6)                                           | 0.015(6)                                           |
|       | 0.20                               | 0.12(5)                                           | 0.006(6)                                           |

**Table S12** Observed *pseudo*-first order rate constants as a function of nucleophile concentration and temperature for the reaction between complex [Pd(DPENIm<sup>iPr</sup>)Cl<sub>2</sub>] and L-Met at pH = 7.2 (25 mM Hepes buffer) in the presence of 30 mM NaCl at 310 K.

| T(K)  | 10 <sup>4</sup> C <sub>L-Met</sub> /M | first step<br>k <sub>obsd1</sub> /s <sup>-1</sup> | second step<br>k <sub>obsd2</sub> /s <sup>-1</sup> |
|-------|---------------------------------------|---------------------------------------------------|----------------------------------------------------|
| 310.0 | 2.40                                  | 0.62(6)                                           | 0.0052(6)                                          |
|       | 2.00                                  | 0.51(6)                                           | 0.0054(6)                                          |
|       | 1.40                                  | 0.35(6)                                           | 0.0055(6)                                          |
|       | 1.00                                  | 0.23(6)                                           | 0.0052(6)                                          |
|       | 0.50                                  | 0.11(6)                                           | 0.0052(6)                                          |
|       | 0.20                                  | 0.05(5)                                           | /                                                  |

**Table S13** Observed *pseudo*-first order rate constants as a function of nucleophile concentration and temperature for the reaction between complex [Pd(DPENIm<sup>iPr</sup>)Cl<sub>2</sub>] and L-His at pH = 7.2 (25 mM Hepes buffer) in the presence of 30 mM NaCl at 310 K.

| T(K)  | 10 <sup>4</sup> C <sub>L-His</sub> /M | first step<br>k <sub>obsd1</sub> /s <sup>-1</sup> | second step<br>k <sub>obsd2</sub> /s <sup>-1</sup> |
|-------|---------------------------------------|---------------------------------------------------|----------------------------------------------------|
| 310.0 | 2.40                                  | 0.37(6)                                           | 0.009(6)                                           |
|       | 2.00                                  | 0.29(6)                                           | 0.008(6)                                           |
|       | 1.40                                  | 0.20(6)                                           | 0.006(6)                                           |
|       | 1.00                                  | 0.14(6)                                           | 0.004(6)                                           |
|       | 0.50                                  | 0.07(6)                                           | 0.002(6)                                           |
|       | 0.20                                  | 0.03(5)                                           | 0.001(6)                                           |

**Table S14** Observed *pseudo*-first order rate constants as a function of nucleophile concentration and temperature for the reaction between complex [Pd(DPENIm<sup>iPr</sup>)Cl<sub>2</sub>] and Gly at pH = 7.2 (25 mM Hepes buffer) in the presence of 30 mM NaCl at 310 K.

| T(K)  | 10 <sup>4</sup> C <sub>Gly</sub> /M | first step<br>k <sub>obsd1</sub> /s <sup>-1</sup> | second step<br>k <sub>obsd2</sub> /s <sup>-1</sup> |
|-------|-------------------------------------|---------------------------------------------------|----------------------------------------------------|
| 310.0 | 2.40                                | 0.20(6)                                           | 0.0053(6)                                          |
|       | 2.00                                | 0.16(6)                                           | 0.0048(6)                                          |
|       | 1.40                                | 0.12(6)                                           | 0.0037(6)                                          |
|       | 1.00                                | 0.09(6)                                           | 0.0025(6)                                          |
|       | 0.50                                | 0.04(6)                                           | 0.0022(6)                                          |
|       | 0.20                                | 0.02(5)                                           | 0.0020(6)                                          |

**Table S15** Observed *pseudo*-first order rate constants as a function of nucleophile concentration and temperature for the reaction between complex [Pd(DMEAIm<sup>iPr</sup>)Cl<sub>2</sub>] and TU at pH = 7.2 (25 mM HEPES buffer) in the presence of 30 mM NaCl at 310 K.

| T(K)  | 10 <sup>4</sup> C <sub>TU</sub> /M | first step<br>k <sub>obsd1</sub> /s <sup>-1</sup> | second step<br>k <sub>obsd2</sub> /s <sup>-1</sup> |
|-------|------------------------------------|---------------------------------------------------|----------------------------------------------------|
| 310.0 | 2.40                               | 1.66(6)                                           | 0.106(6)                                           |
|       | 2.00                               | 1.29(6)                                           | 0.080(6)                                           |
|       | 1.40                               | 1.03(6)                                           | 0.059(6)                                           |
|       | 1.00                               | 0.61(6)                                           | 0.038(6)                                           |
|       | 0.50                               | 0.35(6)                                           | 0.023(6)                                           |
|       | 0.20                               | 0.10(5)                                           | 0.010(6)                                           |

**Table S16** Observed *pseudo*-first order rate constants as a function of nucleophile concentration and temperature for the reaction between complex [Pd(DMEAIm<sup>iPr</sup>)Cl<sub>2</sub>] and L-Met at pH = 7.2 (25 mM HEPES buffer) in the presence of 30 mM NaCl at 310 K.

| T(K)  | 10 <sup>4</sup> C <sub>L-Met</sub> /M | first step<br>k <sub>obsd1</sub> /s <sup>-1</sup> | second step<br>k <sub>obsd2</sub> /s <sup>-1</sup> |
|-------|---------------------------------------|---------------------------------------------------|----------------------------------------------------|
| 310.0 | 2.40                                  | 1.08(6)                                           | 0.0046(6)                                          |
|       | 2.00                                  | 0.95(6)                                           | 0.0045(6)                                          |
|       | 1.40                                  | 0.64(6)                                           | 0.0046(6)                                          |
|       | 1.00                                  | 0.53(6)                                           | 0.0045(6)                                          |
|       | 0.50                                  | 0.22(6)                                           | 0.0045(6)                                          |
|       | 0.20                                  | 0.12(5)                                           | 0.0045(6)                                          |

**Table S17** Observed *pseudo*-first order rate constants as a function of nucleophile concentration and temperature for the reaction between complex [Pd(DMEAI*m*<sup>Pr</sup>)Cl<sub>2</sub>] and L-His at pH = 7.2 (25 mM Hepes buffer) in the presence of 30 mM NaCl at 310 K.

| T(K)  | 10 <sup>4</sup> C <sub>L-His</sub> /M | first step<br>k <sub>obsd1</sub> /s <sup>-1</sup> | second step<br>k <sub>obsd2</sub> /s <sup>-1</sup> |
|-------|---------------------------------------|---------------------------------------------------|----------------------------------------------------|
| 310.0 | 2.40                                  | 1.08(6)                                           | 0.0046(6)                                          |
|       | 2.00                                  | 0.95(6)                                           | 0.0045(6)                                          |
|       | 1.40                                  | 0.64(6)                                           | 0.0046(6)                                          |
|       | 1.00                                  | 0.53(6)                                           | 0.0045(6)                                          |
|       | 0.50                                  | 0.22(6)                                           | 0.0045(6)                                          |
|       | 0.20                                  | 0.12(5)                                           | 0.0045(6)                                          |

**Table S18** Observed *pseudo*-first order rate constants as a function of nucleophile concentration and temperature for the reaction between complex [Pd(DMEAI*m*<sup>Pr</sup>)Cl<sub>2</sub>] and Gly at pH = 7.2 (25 mM Hepes buffer) in the presence of 30 mM NaCl at 310 K.

| T(K)  | 10 <sup>4</sup> C <sub>Gly</sub> /M | first step<br>k <sub>obsd1</sub> /s <sup>-1</sup> | second step<br>k <sub>obsd2</sub> /s <sup>-1</sup> |
|-------|-------------------------------------|---------------------------------------------------|----------------------------------------------------|
| 310.0 | 2.40                                | 1.08(6)                                           | 0.0046(6)                                          |
|       | 2.00                                | 0.95(6)                                           | 0.0045(6)                                          |
|       | 1.40                                | 0.64(6)                                           | 0.0046(6)                                          |
|       | 1.00                                | 0.53(6)                                           | 0.0045(6)                                          |
|       | 0.50                                | 0.22(6)                                           | 0.0045(6)                                          |
|       | 0.20                                | 0.12(5)                                           | 0.0045(6)                                          |



**Table S19** Observed *pseudo*-first order rate constants as a function of nucleophile concentration and temperature for the reaction between complex [Pd(BL<sup>i</sup>Pr)Cl<sub>2</sub>] and TU at pH = 7.2 (25 mM Hepes buffer) in the presence of 30 mM NaCl at 310 K.

| T(K)  | 10 <sup>4</sup> C <sub>TU</sub> /M | first step<br>k <sub>obsd1</sub> /s <sup>-1</sup> | second step<br>k <sub>obsd2</sub> /s <sup>-1</sup> |
|-------|------------------------------------|---------------------------------------------------|----------------------------------------------------|
| 310.0 | 2.40                               | 0.22(6)                                           | 0.045(6)                                           |
|       | 2.00                               | 0.18(6)                                           | 0.035(6)                                           |
|       | 1.40                               | 0.13(6)                                           | 0.026(6)                                           |
|       | 1.00                               | 0.10(6)                                           | 0.020(6)                                           |
|       | 0.50                               | 0.05(6)                                           | 0.008(6)                                           |
|       | 0.20                               | 0.01(5)                                           | 0.004(6)                                           |

**Table S20** Observed *pseudo*-first order rate constants as a function of nucleophile concentration and temperature for the reaction between complex [Pd(BL<sup>i</sup>Pr)Cl<sub>2</sub>] and L-Met at pH = 7.2 (25 mM Hepes buffer) in the presence of 30 mM NaCl at 310 K.

| T(K)  | 10 <sup>4</sup> C <sub>L-Met</sub> /M | first step<br>k <sub>obsd1</sub> /s <sup>-1</sup> | second step<br>k <sub>obsd2</sub> /s <sup>-1</sup> |
|-------|---------------------------------------|---------------------------------------------------|----------------------------------------------------|
| 310.0 | 2.40                                  | 0.130(6)                                          | 0.0085(6)                                          |
|       | 2.00                                  | 0.096(6)                                          | 0.0115(6)                                          |
|       | 1.40                                  | 0.077(6)                                          | 0.0097(6)                                          |
|       | 1.00                                  | 0.044(6)                                          | 0.0074(6)                                          |
|       | 0.50                                  | 0.024(6)                                          | 0.0083(6)                                          |
|       | 0.20                                  | 0.012(5)                                          | /                                                  |

**Table S21** Observed *pseudo*-first order rate constants as a function of nucleophile concentration and temperature for the reaction between complex [Pd(BL<sup>iPr</sup>)Cl<sub>2</sub>] and L-His at pH = 7.2 (25 mM Hepes buffer) in the presence of 30 mM NaCl at 310 K.

| T(K)  | 10 <sup>4</sup> C <sub>L-His</sub> /M | first step<br>k <sub>obsd1</sub> /s <sup>-1</sup> | second step<br>k <sub>obsd2</sub> /s <sup>-1</sup> |
|-------|---------------------------------------|---------------------------------------------------|----------------------------------------------------|
| 310.0 | 2.40                                  | 0.042(6)                                          | 0.0060(6)                                          |
|       | 2.00                                  | 0.033(6)                                          | 0.0048(6)                                          |
|       | 1.40                                  | 0.022(6)                                          | 0.0033(6)                                          |
|       | 1.00                                  | 0.015(6)                                          | 0.0022(6)                                          |
|       | 0.50                                  | 0.008(6)                                          | 0.0013(6)                                          |
|       | 0.20                                  | 0.003(5)                                          | 0.0006(6)                                          |

**Table S22** Observed *pseudo*-first order rate constants as a function of nucleophile concentration and temperature for the reaction between complex [Pd(BL<sup>iPr</sup>)Cl<sub>2</sub>] and Gly at pH = 7.2 (25 mM Hepes buffer) in the presence of 30 mM NaCl at 310 K.

| T(K)  | 10 <sup>4</sup> C <sub>Gly</sub> /M | first step<br>k <sub>obsd1</sub> /s <sup>-1</sup> | second step<br>k <sub>obsd2</sub> /s <sup>-1</sup> |
|-------|-------------------------------------|---------------------------------------------------|----------------------------------------------------|
| 310.0 | 2.40                                | 0.072(6)                                          | 0.069(6)                                           |
|       | 2.00                                | 0.059(6)                                          | 0.068(6)                                           |
|       | 1.40                                | 0.039(6)                                          | 0.066(6)                                           |
|       | 1.00                                | 0.029(6)                                          | 0.064(6)                                           |
|       | 0.50                                | 0.012(6)                                          | 0.063(6)                                           |
|       | 0.20                                | 0.007(5)                                          | /                                                  |

**Table S23** Observed *pseudo*-first order rate constants as a function of nucleophile concentration and temperature for the reaction between complex [Pd(DACH(Im<sup>iPr</sup>)<sub>2</sub>)Cl<sub>2</sub>] and TU at pH = 7.2 (25 mM HEPES buffer) in the presence of 30 mM NaCl at 310 K.

| T(K)  | 10 <sup>4</sup> C <sub>TU</sub> /M | first step<br>k <sub>obsd1</sub> /s <sup>-1</sup> | second step<br>k <sub>obsd2</sub> /s <sup>-1</sup> |
|-------|------------------------------------|---------------------------------------------------|----------------------------------------------------|
| 310.0 | 2.40                               | 0.042(6)                                          | 0.017(6)                                           |
|       | 2.00                               | 0.032(6)                                          | 0.014(6)                                           |
|       | 1.40                               | 0.021(6)                                          | 0.010(6)                                           |
|       | 1.00                               | 0.017(6)                                          | 0.007(6)                                           |
|       | 0.50                               | 0.007(6)                                          | 0.004(6)                                           |
|       | 0.20                               | 0.002(5)                                          | 0.001(6)                                           |

**Table S24** Observed *pseudo*-first order rate constants as a function of nucleophile concentration and temperature for the reaction between complex [Pd(DACH(Im<sup>iPr</sup>)<sub>2</sub>)Cl<sub>2</sub>] and L-Met at pH = 7.2 (25 mM HEPES buffer) in the presence of 30 mM NaCl at 310 K.

| T(K)  | 10 <sup>4</sup> C <sub>L-Met</sub> /M | first step<br>k <sub>obsd1</sub> /s <sup>-1</sup> | second step<br>k <sub>obsd2</sub> /s <sup>-1</sup> |
|-------|---------------------------------------|---------------------------------------------------|----------------------------------------------------|
| 310.0 | 2.40                                  | 0.037(6)                                          | 0.0033(6)                                          |
|       | 2.00                                  | 0.029(6)                                          | 0.0038(6)                                          |
|       | 1.40                                  | 0.022(6)                                          | 0.0032(6)                                          |
|       | 1.00                                  | 0.014(6)                                          | 0.0039(6)                                          |
|       | 0.50                                  | 0.009(6)                                          | 0.0032(6)                                          |
|       | 0.20                                  | 0.002(5)                                          | /                                                  |

**Table S25** Observed *pseudo*-first order rate constants as a function of nucleophile concentration and temperature for the reaction between complex [Pd(DACH(Im<sup>iPr</sup>)<sub>2</sub>)Cl<sub>2</sub>] and L-His at pH = 7.2 (25 mM Hepes buffer) in the presence of 30 mM NaCl at 310 K.

| T(K)  | 10 <sup>4</sup> C <sub>L-His</sub> /M | first step<br>k <sub>obsd1</sub> /s <sup>-1</sup> | second step<br>k <sub>obsd2</sub> /s <sup>-1</sup> |
|-------|---------------------------------------|---------------------------------------------------|----------------------------------------------------|
| 310.0 | 2.40                                  | 0.031(6)                                          | 0.0047(6)                                          |
|       | 2.00                                  | 0.028(6)                                          | 0.0037(6)                                          |
|       | 1.40                                  | 0.020(6)                                          | 0.0027(6)                                          |
|       | 1.00                                  | 0.013(6)                                          | 0.0020(6)                                          |
|       | 0.50                                  | 0.008(6)                                          | 0.0009(6)                                          |
|       | 0.20                                  | 0.003(5)                                          | 0.0004(6)                                          |

**Table S26** Observed *pseudo*-first order rate constants as a function of nucleophile concentration and temperature for the reaction between complex [Pd(DACH(Im<sup>iPr</sup>)<sub>2</sub>)Cl<sub>2</sub>] and Gly at pH = 7.2 (25 mM Hepes buffer) in the presence of 30 mM NaCl at 310 K.

| T(K)  | 10 <sup>4</sup> C <sub>Gly</sub> /M | first step<br>k <sub>obsd1</sub> /s <sup>-1</sup> | second step<br>k <sub>obsd2</sub> /s <sup>-1</sup> |
|-------|-------------------------------------|---------------------------------------------------|----------------------------------------------------|
| 310.0 | 2.40                                | 0.023(6)                                          | 0.0063(6)                                          |
|       | 2.00                                | 0.020(6)                                          | 0.0062(6)                                          |
|       | 1.40                                | 0.014(6)                                          | 0.0061(6)                                          |
|       | 1.00                                | 0.010(6)                                          | 0.0060(6)                                          |
|       | 0.50                                | 0.004(6)                                          | 0.0062(6)                                          |
|       | 0.20                                | 0.002(5)                                          | 0.0058(6)                                          |

**Table S27** The rate constants obtained for the substitution reactions of [Pd(en)Cl<sub>2</sub>] complexes with TU at a few different temperatures.

| T(K)  | first step<br>k <sub>1</sub> [M <sup>-1</sup> s <sup>-1</sup> ] | second step<br>k <sub>2</sub> [M <sup>-1</sup> s <sup>-1</sup> ] |
|-------|-----------------------------------------------------------------|------------------------------------------------------------------|
| 310.0 | (6.95 ± 0.10) 10 <sup>5</sup>                                   | (1.53 ± 0.20) 10 <sup>4</sup>                                    |
| 303.0 | (5.91 ± 0.10) 10 <sup>5</sup>                                   | (1.32 ± 0.10) 10 <sup>4</sup>                                    |
| 298.0 | (5.40 ± 0.10) 10 <sup>5</sup>                                   | (1.10 ± 0.10) 10 <sup>4</sup>                                    |
| 293.0 | (4.59 ± 0.10) 10 <sup>5</sup>                                   | (0.88 ± 0.10) 10 <sup>4</sup>                                    |

**Table S28** The rate constants obtained for the substitution reactions of [Pd(EAIm<sup>i</sup>Pr)Cl<sub>2</sub>] complexes with TU at a few different temperatures.

| T(K)  | first step<br>k <sub>1</sub> [M <sup>-1</sup> s <sup>-1</sup> ] | second step<br>k <sub>2</sub> [M <sup>-1</sup> s <sup>-1</sup> ] |
|-------|-----------------------------------------------------------------|------------------------------------------------------------------|
| 310.0 | (1.25 ± 0.20) 10 <sup>5</sup>                                   | (8.52 ± 0.10) 10 <sup>2</sup>                                    |
| 298.0 | (8.49 ± 0.10) 10 <sup>4</sup>                                   | (5.71 ± 0.10) 10 <sup>2</sup>                                    |
| 288.0 | (6.10 ± 0.10) 10 <sup>4</sup>                                   | (3.58 ± 0.10) 10 <sup>2</sup>                                    |
| 283.0 | (4.37 ± 0.20) 10 <sup>4</sup>                                   | (2.56 ± 0.10) 10 <sup>2</sup>                                    |

**Table S29** The rate constants obtained for the substitution reactions of [Pd(DMEAlm<sup>iPr</sup>)Cl<sub>2</sub>] complexes with TU at a few different temperatures.

| T(K)  | first step<br>k <sub>1</sub> [M <sup>-1</sup> s <sup>-1</sup> ] | second step<br>k <sub>2</sub> [M <sup>-1</sup> s <sup>-1</sup> ] |
|-------|-----------------------------------------------------------------|------------------------------------------------------------------|
| 310.0 | (6.78 ± 0.20) 10 <sup>3</sup>                                   | (4.22 ± 0.10) 10 <sup>2</sup>                                    |
| 303.0 | (4.90 ± 0.10) 10 <sup>3</sup>                                   | (3.20 ± 0.10) 10 <sup>2</sup>                                    |
| 293.0 | (3.14 ± 0.20) 10 <sup>3</sup>                                   | (2.08 ± 0.10) 10 <sup>2</sup>                                    |
| 288.0 | (2.54 ± 0.10) 10 <sup>3</sup>                                   | (1.78 ± 0.10) 10 <sup>2</sup>                                    |
| 283.0 | (2.21 ± 0.10) 10 <sup>3</sup>                                   | (1.55 ± 0.10) 10 <sup>2</sup>                                    |

**Table S30** The rate constants obtained for the substitution reactions of [Pd(DPENIm<sup>iPr</sup>)Cl<sub>2</sub>] complexes with TU at a few different temperatures.

| T(K)  | first step<br>k <sub>1</sub> [M <sup>-1</sup> s <sup>-1</sup> ] | second step<br>k <sub>2</sub> [M <sup>-1</sup> s <sup>-1</sup> ] |
|-------|-----------------------------------------------------------------|------------------------------------------------------------------|
| 310.0 | (5.13 ± 0.20) 10 <sup>3</sup>                                   | (2.80 ± 0.20) 10 <sup>2</sup>                                    |
| 303.0 | (4.97 ± 0.10) 10 <sup>3</sup>                                   | (2.51 ± 0.10) 10 <sup>2</sup>                                    |
| 293.0 | (4.72 ± 0.20) 10 <sup>3</sup>                                   | (2.04 ± 0.10) 10 <sup>2</sup>                                    |
| 288.0 | (4.61 ± 0.10) 10 <sup>3</sup>                                   | (1.93 ± 0.10) 10 <sup>2</sup>                                    |

**Table S31** The rate constants obtained for the substitution reactions of [Pd(BL<sup>iPr</sup>)Cl<sub>2</sub>] complexes with TU at a few different temperatures.

| T(K)  | first step<br>k <sub>1</sub> [M <sup>-1</sup> s <sup>-1</sup> ] | second step<br>k <sub>2</sub> [M <sup>-1</sup> s <sup>-1</sup> ] |
|-------|-----------------------------------------------------------------|------------------------------------------------------------------|
| 310.0 | (5.13 ± 0.20) 10 <sup>3</sup>                                   | (2.80 ± 0.20) 10 <sup>2</sup>                                    |
| 303.0 | (4.97 ± 0.10) 10 <sup>3</sup>                                   | (2.51 ± 0.10) 10 <sup>2</sup>                                    |
| 293.0 | (4.72 ± 0.20) 10 <sup>3</sup>                                   | (2.04 ± 0.10) 10 <sup>2</sup>                                    |
| 288.0 | (4.61 ± 0.10) 10 <sup>3</sup>                                   | (1.93 ± 0.10) 10 <sup>2</sup>                                    |

**Table S32** The rate constants obtained for the substitution reactions of [Pd(DACH(Im<sup>iPr</sup>)<sub>2</sub>)Cl<sub>2</sub>] complexes with TU at a few different temperatures.

| T(K)  | first step<br>k <sub>1</sub> [M <sup>-1</sup> s <sup>-1</sup> ] | second step<br>k <sub>2</sub> [M <sup>-1</sup> s <sup>-1</sup> ] |
|-------|-----------------------------------------------------------------|------------------------------------------------------------------|
| 310.0 | (1.64 ± 0.20) 10 <sup>2</sup>                                   | (0.71 ± 0.10) 10 <sup>2</sup>                                    |
| 303.0 | (1.37 ± 0.10) 10 <sup>2</sup>                                   | (0.51 ± 0.10) 10 <sup>2</sup>                                    |
| 293.0 | (0.34 ± 0.10) 10 <sup>2</sup>                                   | (0.34 ± 0.10) 10 <sup>2</sup>                                    |
| 288.0 | (0.23 ± 0.20) 10 <sup>2</sup>                                   | (0.23 ± 0.10) 10 <sup>2</sup>                                    |
